# Supplementary material for: Mechanisms of FSH- and Amphiregulin-Induced MAP Kinase 3/1 Activation in Pig Cumulus-Oocyte Complexes During Maturation In Vitro
Source: PubMed Central journal article supplement (PMC6429514; doi:10.3390/ijms20051179), 2019-03-07
Supplement: ijms-20-01179-s001.pdf [file ijms-20-01179-s001.pdf]

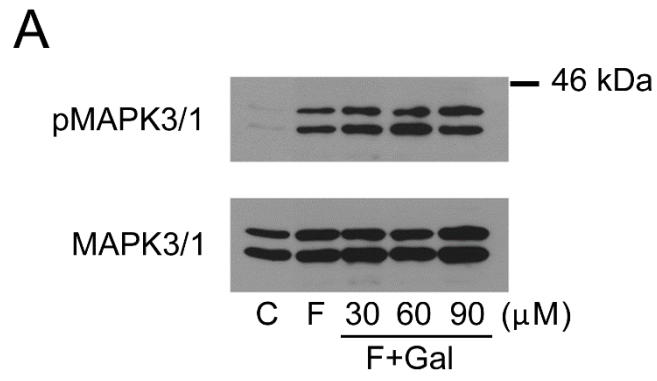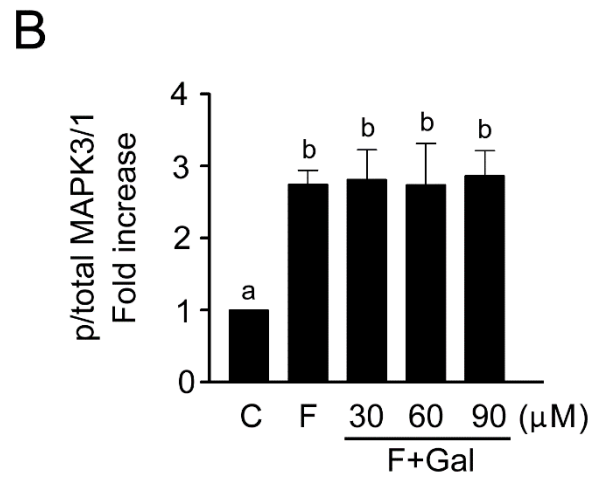

**Figure S1.** Effect of metalloproteinase inhibition by different concentration of galardin on FSH-induced rapid activation of MAPK3/1 in pig cumulus-oocyte complexes.
